# Supplementary material for: The direct and one-pot transformation of xylan into the biodegradable surfactants, alkyl xylosides, is aided by an ionic liquid
Source: Royal Society of Chemistry journal article supplement (doi:10.1039/c3ra42680g), 2013-01-01
Supplement: c3ra42680g.pdf [file c3ra42680g.pdf]

## **Supporting Information**

# **The direct and one-pot transformation of xylan into the biodegradable surfactants, alkyl xylosides, is aided by an ionic liquid**

Maiko Sekine, Tomoya Kimura, Yasushi Katayama, Daisuke Takahashi, and  
Kazunobu Toshima\*

*Department of Applied Chemistry, Faculty of Science and Technology, Keio University,  
3-14-1 Hiyoshi, Kohoku-ku, Yokohama 223-8522, Japan*

| Page |       | Contents                                               |
|------|-------|--------------------------------------------------------|
| S2   | • • • | General experimental methods                           |
| S2   | • • • | General procedure for the glycosylations in Tables 1-3 |
| S2   | • • • | Synthesis of alkyl xylosides                           |
| S4   | • • • | References                                             |
| S5   | • • • | <sup>1</sup> H and <sup>13</sup> C NMR spectra         |

### General experimental methods

Melting points were determined on a micro hot-stage (Yanako MP-S3). Optical rotations were measured on a JASCO P-2200 polarimeter.  $^1\text{H}$  and  $^{13}\text{C}$  NMR spectra were recorded on a JEOL ECA-500 (500 MHz and 125 MHz) spectrometer.  $^1\text{H}$  NMR data are reported as follows; chemical shift in parts per million (ppm) downfield or upfield, integration, multiplicity (br = broad, s = singlet, d = doublet, t = triplet and m = multiplet) and coupling constants (Hz).  $^{13}\text{C}$  chemical shifts are reported in ppm downfield or upfield from  $\text{CD}_3\text{OD}$  ( $\delta$  49.00). Silica gel TLC and column chromatography were performed on Merck TLC 60F-254 (0.25 mm) and Silica Gel 60 N (spherical, neutral, 40-50  $\mu\text{m}$ ) (Kanto Chemical Co., Inc.), respectively.

### General procedure for the glycosylations in Tables 1-3

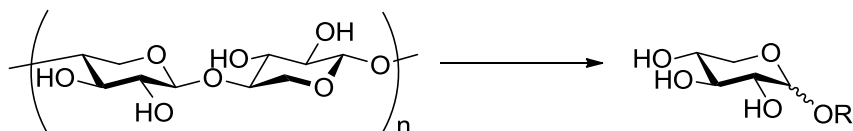

A suspension of xylan (20.0 mg) in ionic liquid (400 mg) was heated with stirring at 90 °C until a clear solution formed. To the resulting solution were added a fatty alcohol and an acid catalyst. After the mixture was stirred at indicated temperature for indicated reaction time, the reaction was quenched by addition of  $\text{H}_2\text{O}$  (0.5 mL). The resulting mixture was extracted with EtOAc (1 mL x 5) and the combined extracts were concentrated in *vacuo*. Purification of the residue by flash column chromatography ( $\text{CHCl}_3/\text{MeOH} = 9/1$ ) gave the corresponding alkyl xyloside.

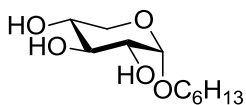

**Hexyl  $\alpha$ -D-xylopyranoside<sup>[1]</sup>**: White solid;  $R_f$  0.39 (9/1  $\text{CHCl}_3/\text{MeOH}$ );  $[\alpha]_D^{24} +132.2$  ( $c$  1.0, MeOH); mp 73-74 °C;  $^1\text{H}$  NMR (500 MHz,  $\text{CD}_3\text{OD}$ )  $\delta$  4.70 (d, 1H,  $J = 3.5$  Hz), 3.70-3.64 (m, 1H), 3.59-3.40 (m, 5H), 3.35 (dd, 1H,  $J = 3.5, 9.5$  Hz), 1.69-1.56 (m, 2H), 1.47-1.27 (m, 6H), 0.91 (t, 3H,  $J = 7.0$  Hz);  $^{13}\text{C}$  NMR (125 MHz,  $\text{CD}_3\text{OD}$ )  $\delta$  100.3, 75.2, 73.6, 71.6, 69.3, 63.0, 32.9, 30.6, 27.0, 23.7, 14.4.

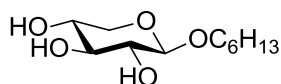

**Hexyl  $\beta$ -D-xylopyranoside<sup>[1]</sup>:** White solid;  $R_f$  0.43 (9/1 CHCl<sub>3</sub>/MeOH);  $[\alpha]_D^{24}$  -48.9 ( $c$  1.0, MeOH); mp 71-72 °C; <sup>1</sup>H NMR (500 MHz, CD<sub>3</sub>OD)  $\delta$  4.18 (d, 1H,  $J$  = 7.5 Hz), 3.85-3.77 (m, 2H), 3.54-3.44 (m, 2H), 3.34-3.27 (m, 1H), 3.20-3.13 (m, 2H), 1.63-1.57 (m, 2H), 1.41-1.29 (m, 6H), 0.90 (t, 3H,  $J$  = 7.0 Hz); <sup>13</sup>C NMR (125 MHz, CD<sub>3</sub>OD)  $\delta$  105.0, 77.9, 74.9, 71.2, 70.9, 66.9, 32.8, 30.8, 26.8, 23.7, 14.4.

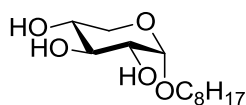

**Octyl  $\alpha$ -D-xylopyranoside<sup>[2]</sup>:** White solid;  $R_f$  0.38 (9/1 CHCl<sub>3</sub>/MeOH);  $[\alpha]_D^{24}$  +115.0 ( $c$  1.0, MeOH); mp 75-76 °C; <sup>1</sup>H NMR (500 MHz, CD<sub>3</sub>OD)  $\delta$  4.70 (d, 1H,  $J$  = 3.5 Hz), 3.69-3.64 (m, 1H), 3.59-3.40 (m, 5H), 3.35 (dd, 1H,  $J$  = 3.5, 9.5 Hz), 1.67-1.60 (m, 2H), 1.42-1.30 (m, 10H), 0.90 (t, 3H,  $J$  = 7.0 Hz); <sup>13</sup>C NMR (125 MHz, CD<sub>3</sub>OD)  $\delta$  100.3, 75.2, 73.6, 71.6, 69.2, 63.0, 33.0, 30.7, 30.6, 30.4, 27.4, 23.7, 14.4.

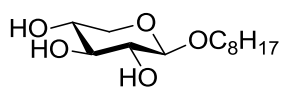

**Octyl  $\beta$ -D-xylopyranoside<sup>[2]</sup>:** White solid;  $R_f$  0.40 (9/1 CHCl<sub>3</sub>/MeOH);  $[\alpha]_D^{24}$  -31.3 ( $c$  1.0, MeOH); mp 74-75 °C; <sup>1</sup>H NMR (500 MHz, CD<sub>3</sub>OD)  $\delta$  4.18 (d, 1H,  $J$  = 7.5 Hz), 3.85-3.77 (m, 2H), 3.54-3.44 (m, 2H), 3.35-3.27 (m, 1H), 3.20-3.13 (m, 2H), 1.63-1.58 (m, 2H), 1.38-1.30 (m, 10H), 0.90 (t, 3H,  $J$  = 7.0 Hz); <sup>13</sup>C NMR (125 MHz, CD<sub>3</sub>OD)  $\delta$  105.1, 77.9, 74.9, 71.2, 70.9, 66.9, 33.0, 30.8, 30.5, 30.4, 27.1, 23.7, 14.4.

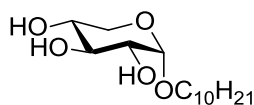

**Decanyl  $\alpha$ -D-xylopyranoside<sup>[3]</sup>:** White solid;  $R_f$  0.40 (9/1 CHCl<sub>3</sub>/MeOH);  $[\alpha]_D^{24}$  +101.5 ( $c$  1.0, MeOH); mp 66-67 °C; <sup>1</sup>H NMR (500 MHz, CD<sub>3</sub>OD)  $\delta$  4.70 (d, 1H,  $J$  = 3.5 Hz), 3.69-3.64 (m, 1H), 3.59-3.41 (m, 5H), 3.35 (dd, 1H,  $J$  = 3.5, 9.5 Hz), 1.68-1.58 (m, 2H), 1.44-1.30 (m, 14H), 0.90 (t, 3H,  $J$  = 7.0 Hz); <sup>13</sup>C NMR (125 MHz, CD<sub>3</sub>OD)  $\delta$  100.3, 75.2, 73.6, 71.6, 69.2, 63.0, 33.1, 30.8, 30.7, 30.6, 30.5, 27.4, 23.7, 14.4.

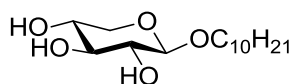

**Decanyl  $\beta$ -D-xylopyranoside<sup>[3]</sup>:** White solid;  $R_f$  0.44 (9/1  $\text{CHCl}_3/\text{MeOH}$ );  $[\alpha]_D^{24}$   $-36.5$  ( $c$  1.0, MeOH); mp 69-70 °C;  $^1\text{H}$  NMR (500 MHz,  $\text{CD}_3\text{OD}$ )  $\delta$  4.18 (d, 1H,  $J = 7.5$  Hz), 3.85-3.77 (m, 2H), 3.54-3.44 (m, 2H), 3.32-3.27 (m, 1H), 3.20-3.13 (m, 2H), 1.63-1.57 (m, 2H), 1.38-1.29 (m, 14H), 0.90 (t, 3H,  $J = 7.0$  Hz);  $^{13}\text{C}$  NMR (125 MHz,  $\text{CD}_3\text{OD}$ )  $\delta$  105.1, 77.9, 74.9, 71.2, 70.9, 66.9, 33.1, 30.8, 30.7 $\times$ 2, 30.6, 30.5, 27.1, 23.7, 14.4.

## References

- [1] N. Villandier and A. Corma, *Chem. Commun.* 2010, **46**, 4408.
- [2] W. Xu, G. Osei-Prempeh, C. Lema, E. D. Oldham, R. J. Aguilera, S. Parkin, S. E. Rankin, B. L. Knutson and H.-J. Lehmler, *Carbohydr. Res.*, 2012, **349**, 12.
- [3] F. Bouxin, S. Marinkovic, J. L. Bras and B. Estrine, *Carbohydr. Res.*, 2010, **345**, 2469.

## **$^1\text{H}$ and $^{13}\text{C}$ NMR spectra**

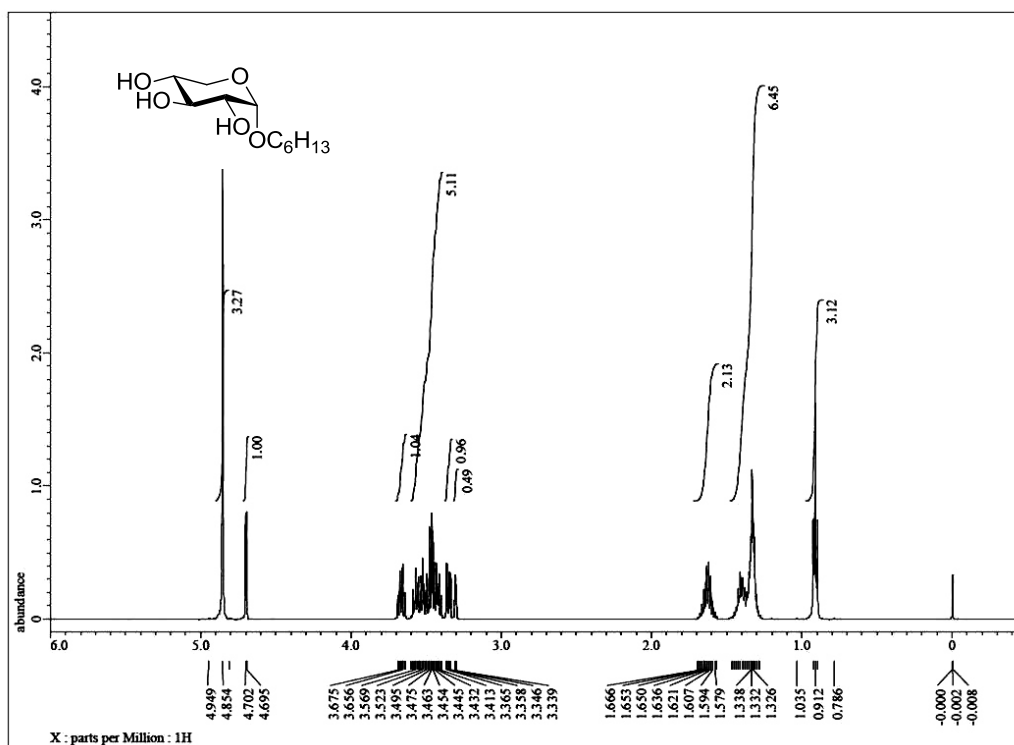

Figure 1.  $^1\text{H}$  NMR spectrum of hexyl  $\alpha$ -D-xylopyranoside

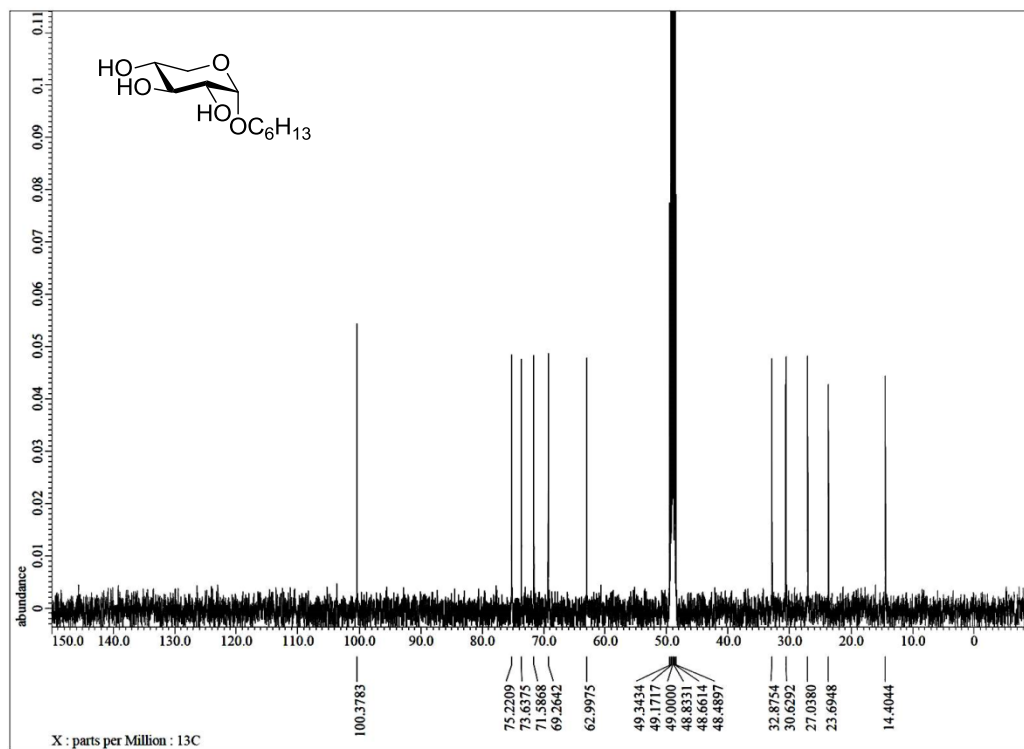

Figure 2.  $^{13}\text{C}$  NMR spectrum of hexyl  $\alpha$ -D-xylopyranoside

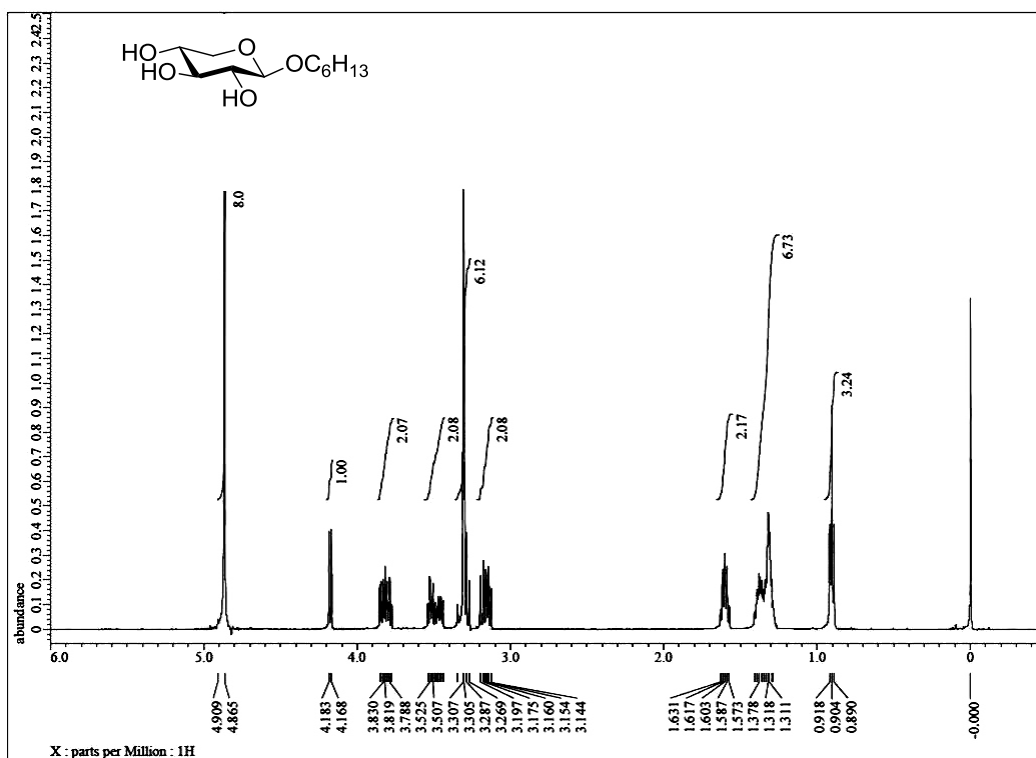

Figure 3.  $^1\text{H}$  NMR spectrum of hexyl  $\beta$ -D-xylopyranoside

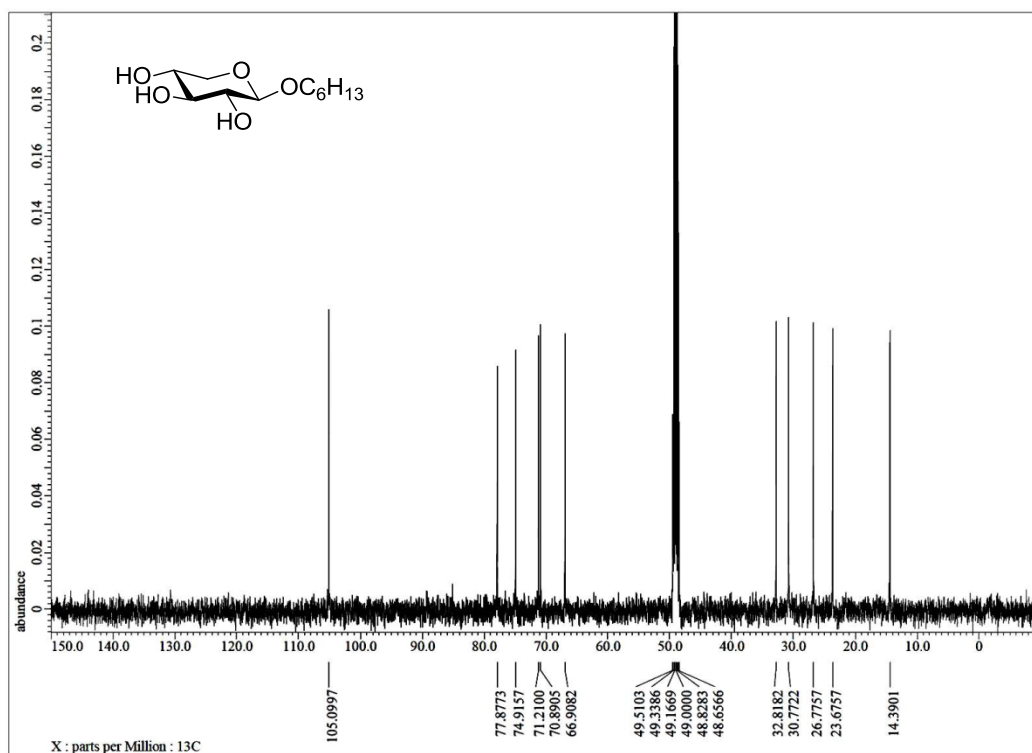

Figure 4.  $^{13}\text{C}$  NMR spectrum of hexyl  $\beta$ -D-xylopyranoside

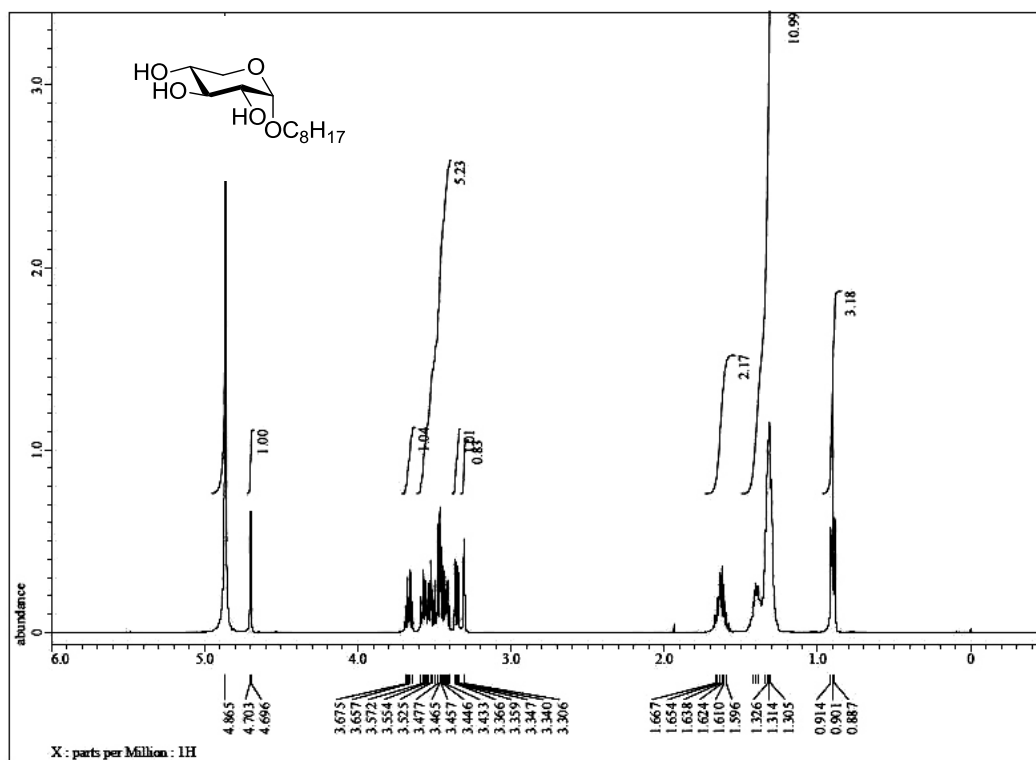

Figure 5.  $^1\text{H}$  NMR spectrum of octyl  $\alpha$ -D-xylopyranoside

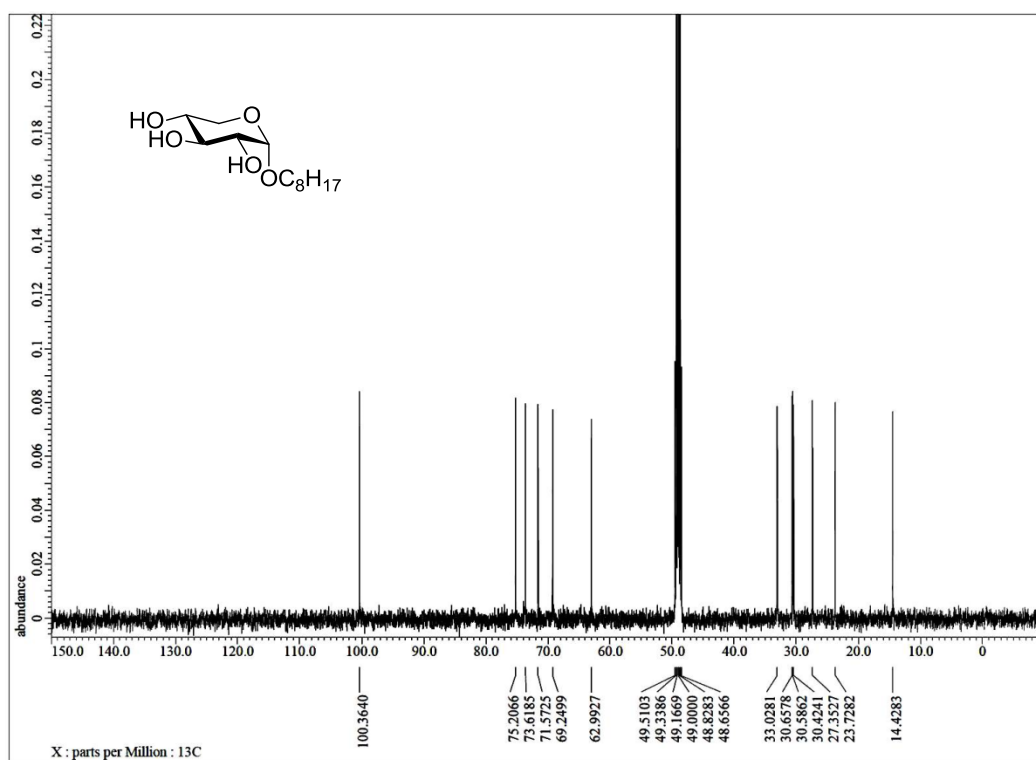

Figure 6.  $^{13}\text{C}$  NMR spectrum of octyl  $\alpha$ -D-xylopyranoside



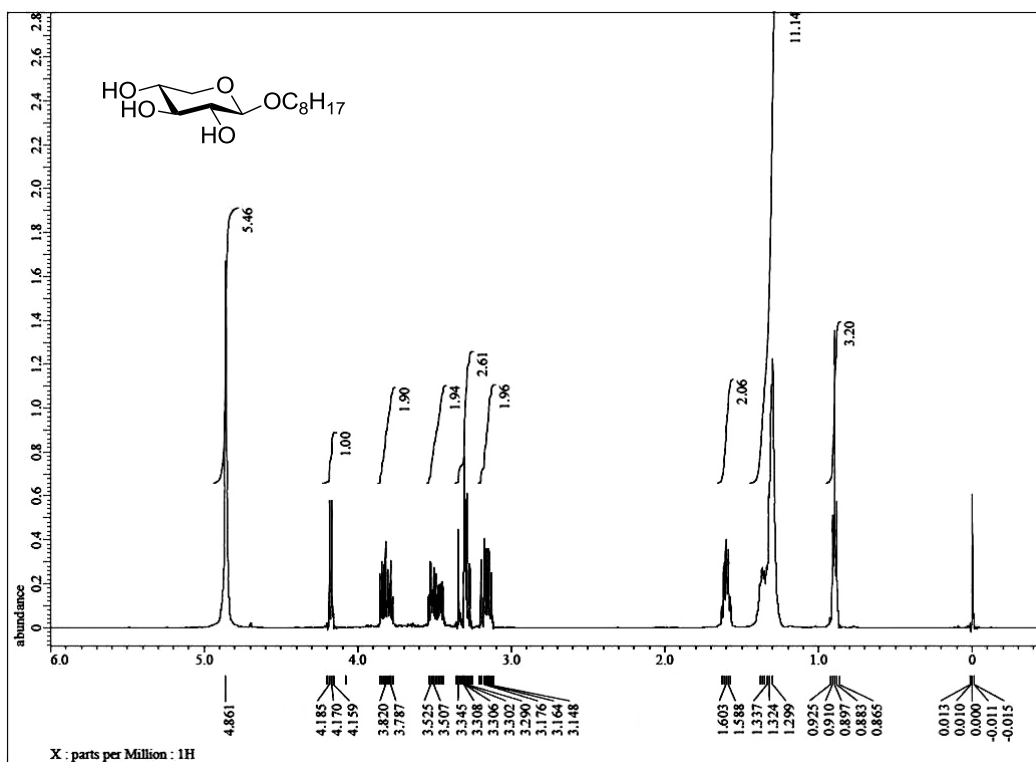

Figure 7.  $^1\text{H}$  NMR spectrum of octyl  $\beta$ -D-xylopyranoside

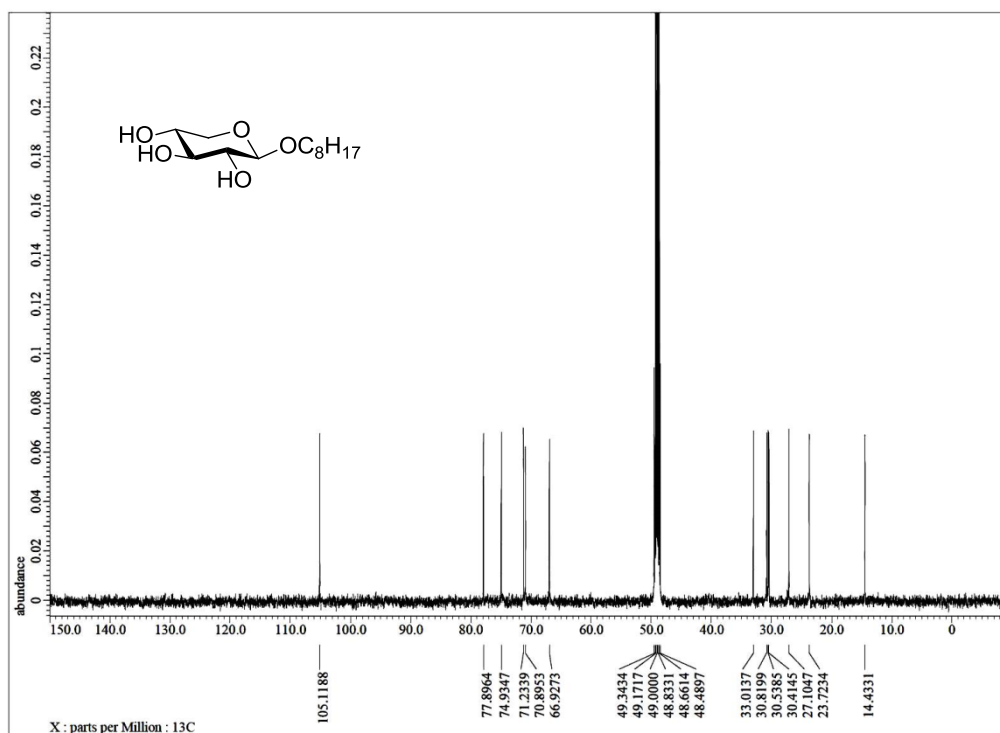

Figure 8.  $^{13}\text{C}$  NMR spectrum of octyl  $\beta$ -D-xylopyranoside

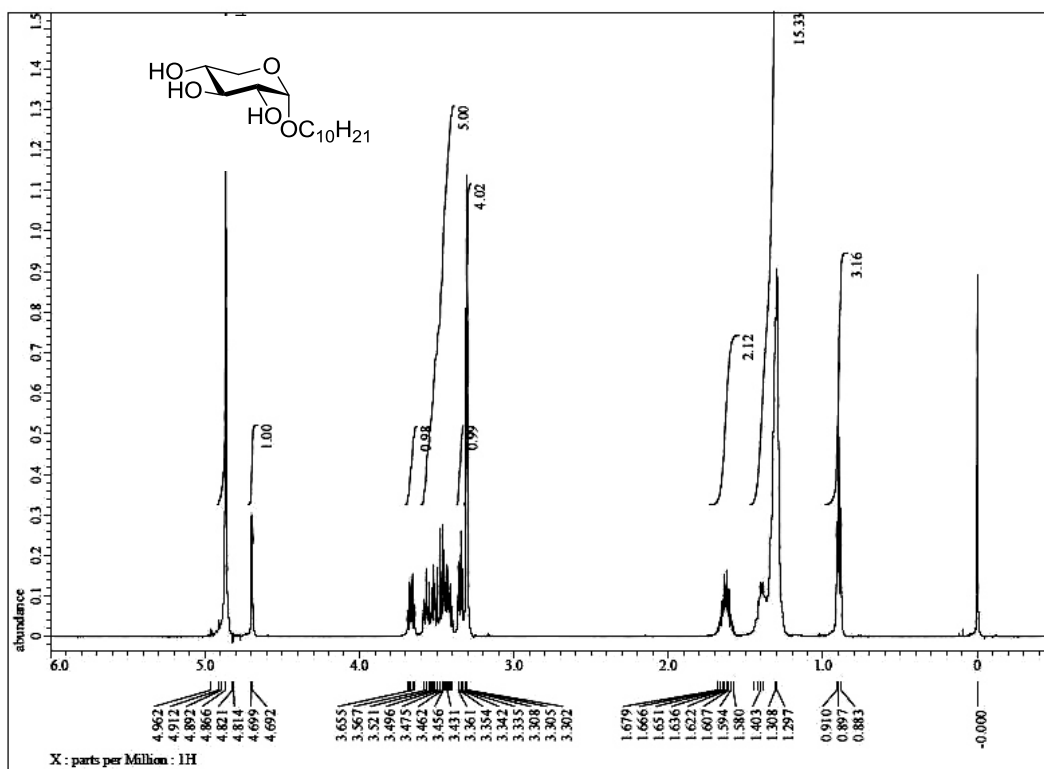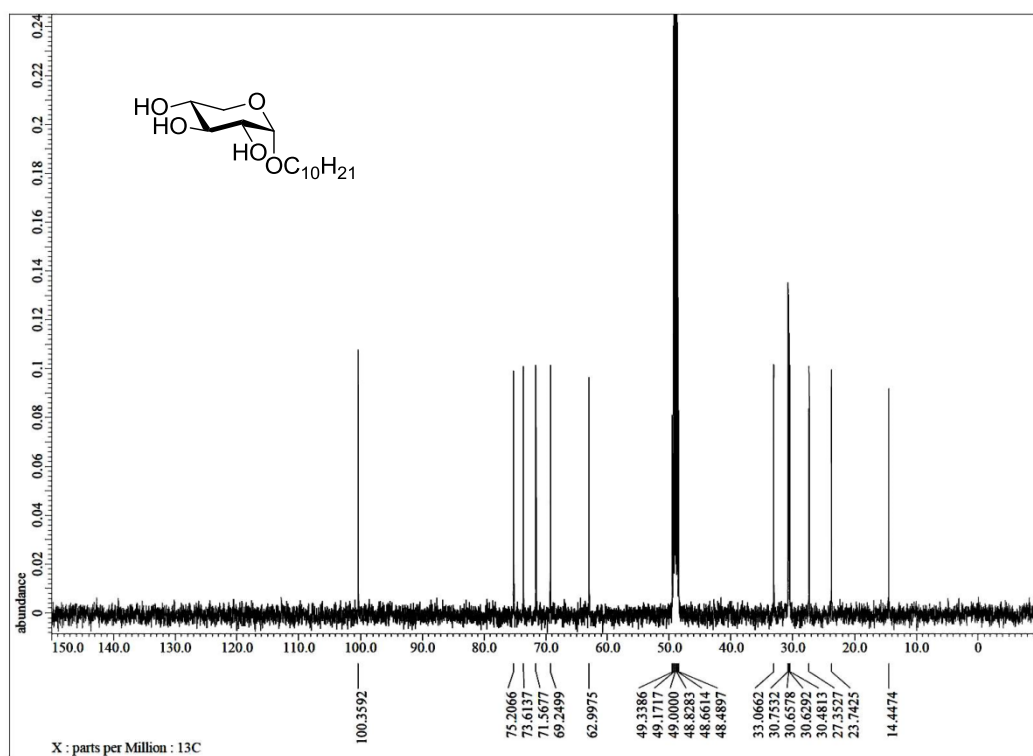

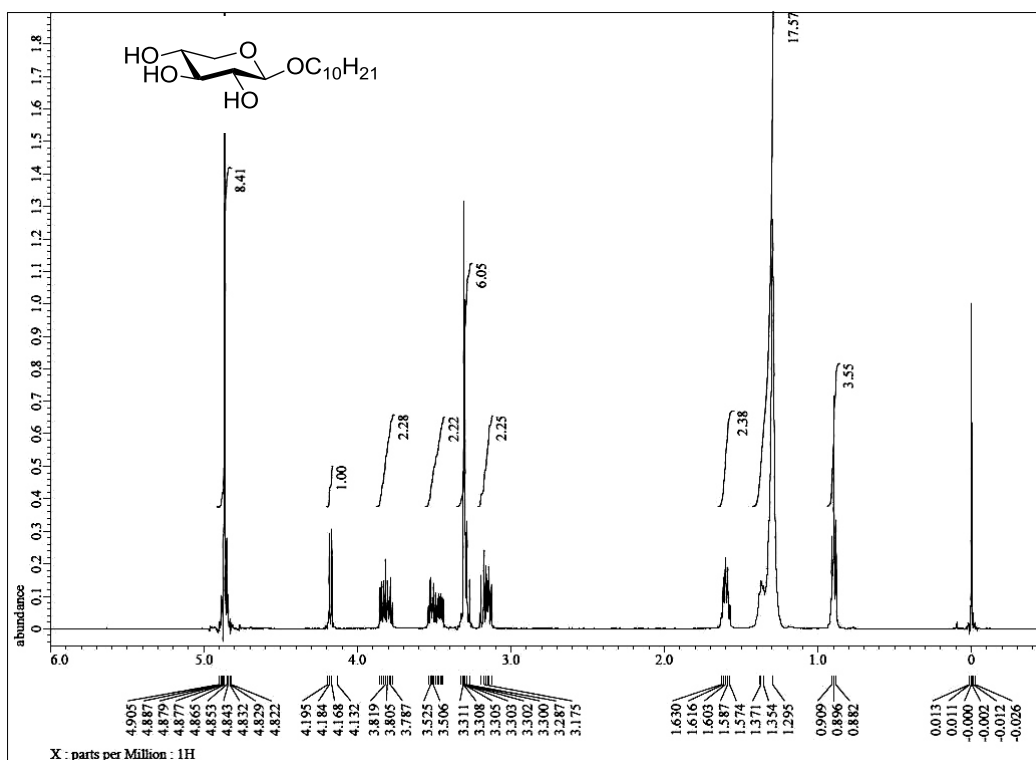

Figure 11.  $^1\text{H}$  NMR spectrum of decanyl  $\beta$ -D-xylopyranoside

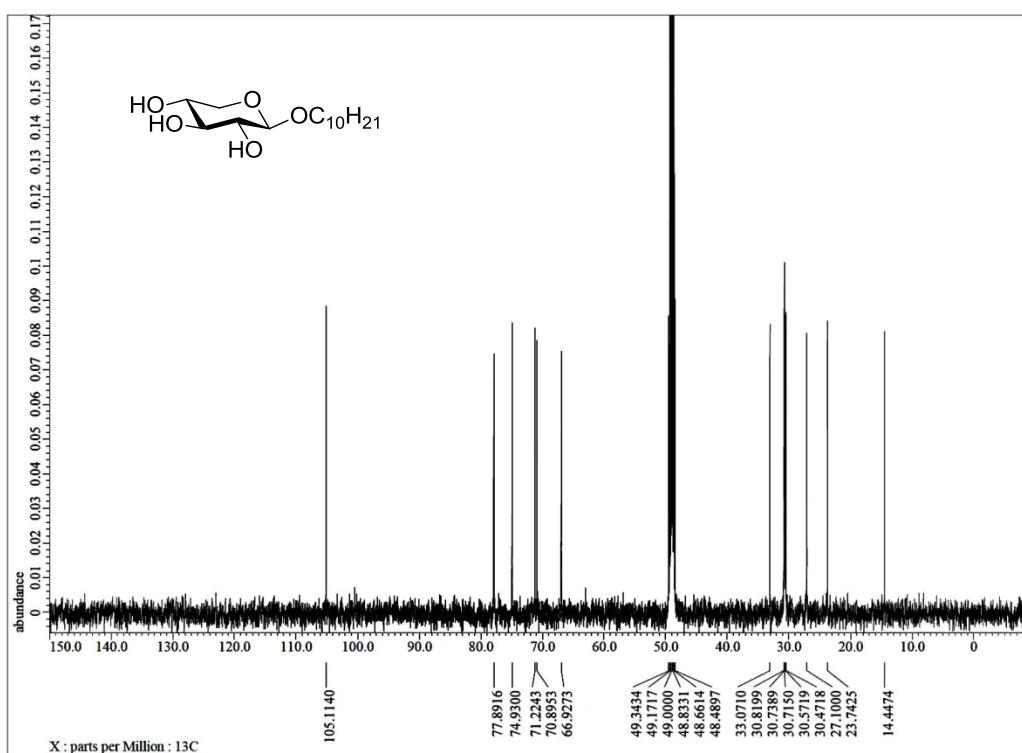

Figure 12.  $^{13}\text{C}$  NMR spectrum of decanyl  $\beta$ -D-xylopyranoside
